# Supplementary material for: Uncovering the microscopic mechanism of incorporating Mn2+ ions into CsPbCl3 crystal lattice
Source: Royal Society of Chemistry journal article supplement (doi:10.1039/c9tc03995c), 2019-01-01
Supplement: c9tc03995c1.pdf [file c9tc03995c1.pdf]

*Electronic Supporting Information*

**Uncovering the microscopic mechanism of incorporating Mn<sup>2+</sup> ions into CsPbCl<sub>3</sub> crystal lattice**

Jienan Xia,<sup>a,†</sup> Song Lu,<sup>b,†</sup> Lei Lei,<sup>a\*</sup> Youjie Hua,<sup>a</sup> Shiqing Xu<sup>a\*</sup>

<sup>a</sup>Institute of Optoelectronic Materials and Devices, China Jiliang University, Hangzhou 310018, P R. China

<sup>b</sup>Department of Physical and Macromolecular Chemistry, Faculty of Science, Charles University in Prague, 128 43 Prague 2, Czech Republic

<sup>†</sup> These authors contributed equally to this work.

**Characterizations.** The crystal structures were tested by X-ray diffraction (XRD), using a powder diffractometer (Bruker D8 Advance), with a radiation of Cu-K $\alpha$  ( $\lambda$ =1.5405 Å). The morphology of the products was characterized by scanning transmission electron microscopy (STEM) using a field emission transmission electron microscope (TEM, FEI Tecnai G<sup>2</sup> F20). All the samples were prepared through diluting the nanocrystals in cyclohexane, then dropping it onto a copper grid coated with carbon film and evaporating the solvent afterwards. X-ray photoelectron spectroscopy (XPS) analysis was carried out using a 250Xi ESCA system under Al K $\alpha$  irradiation. All the binding energies were calibrated to the C 1s peak of the surface adventitious carbon at 284.6 eV. The actual chemical compositions were measured via the inductively coupled plasma (ICP) technique with a PerkinElmer Optima 3300DV spectrometer. Optical absorption (Abs.) spectra were measured by using a UV-VIS-NIR spectrophotometer (Shimadzu UV3600). Photoluminescence (PL), photoluminescence excitation (PLE), photoluminescence quantum yield (PLQY) and Mn<sup>2+</sup> decay curves for the Mn-doped CsPbCl<sub>3</sub> NCs were performed by an Edinburgh Instruments FLS920 spectrophotometer using Xenon lamps as the excitation source. The temperature dependent photoluminescence properties were recorded by the above spectrometer equipped with a TAP-02 temperature controller (ORIENT KOJI, China).

**Computation method (Part II).**

Considering the chemical potentials of constitute elements could make a big difference to the defect formation energies<sup>[1]</sup>, we calculated the stability region of different products against Pb and Cl chemical potential. First, the chemical potentials of Cs, Pb and Cl atoms should be less than 0 eV, so as to avoid the formation of those elementary substances during the synthetic process. Besides, equilibrium growth of a stable CsPbCl<sub>3</sub> also required the chemical potentials satisfy that<sup>[2]</sup>

$$\mu(\text{Cs}) + \mu(\text{Pb}) + \mu(\text{Cl}) = \Delta E(\text{CsPbCl}_3) = -17.625 \text{ eV}$$

where  $\Delta E(\text{CsPbCl}_3)$  was the total energy of the pristine CsPbCl<sub>3</sub> single cell. Finally, in order to avoid the formation of secondary products such as CsCl and PbCl<sub>2</sub>, we set up the following restrictions,

$$\mu(\text{Cs}) + \mu(\text{Cl}) < \Delta E(\text{CsCl}) = -6.101 \text{ eV}$$

$$\mu(\text{Pb}) + 2\mu(\text{Cl}) < \Delta E(\text{PbCl}_2) = -10.705 \text{ eV}$$

where  $\Delta E(\text{CsCl})$  and  $\Delta E(\text{PbCl}_2)$  were the total energies of the CsCl and PbCl<sub>2</sub> single cells, respectively. Under all the above limitations, the available equilibrium chemical potential region for CsPbCl<sub>3</sub> was achieved (Figure 4a).

In this work, we considered several point defects ( $V_{\text{Pb}}$ ,  $V_{\text{Cl}}$ ,  $V_{\text{Pb-Cl}}$  and  $V_{\text{Pb-2Cl}}$ ) in the pristine CsPbCl<sub>3</sub>. The  $V_{\text{Pb-Cl-1}}$ ,  $V_{\text{Pb-Cl-2}}$  and  $V_{\text{Pb-Cl-3}}$  were three different  $V_{\text{Pb-Cl}}$  double vacancies (Figure S1, ESI), where  $V_{\text{Pb-Cl-1}}$  represented bond [Pb---Cl] vacancy pair,  $V_{\text{Pb-Cl-2}}$  represented a Pb<sup>2+</sup> vacancy together with a non-connective but closer Cl<sup>-</sup> vacancy and  $V_{\text{Pb-Cl-3}}$  represented a Pb<sup>2+</sup> vacancy together with a non-connective and farther distance Cl<sup>-</sup> vacancy. Two characteristic points A and B shown in Figure 4a which represented different growth environment were chosen to calculate the formation energies of kinds of defective crystals. Furthermore, the total charge density of (0 0 1) surface of pristine and Mn-doped CsPbCl<sub>3</sub> were calculated to reveal the size evolution mechanism.

**Table S1.** The formation energies of diverse defects in CsPbCl<sub>3</sub> at Points A and B (Figure 4a) with unit eV. V<sub>Pb</sub> and V<sub>Cl</sub> represented single Pb<sup>2+</sup> or Cl<sup>-</sup> vacancy, V<sub>Pb-Cl-1</sub>, V<sub>Pb-Cl-2</sub> and V<sub>Pb-Cl-3</sub> were three types of double vacancies, which were illustrated in Figure S1. D<sub>Mn-Cl</sub> and D<sub>Mn</sub> were the respectively introducing of the [Mn---Cl] ion pair and Mn<sup>2+</sup> into the Pb<sup>2+</sup>-vacancy involved defective crystal structure with the lowest FE. Sub<sub>Mn</sub> represented the substitution energy of replacing Pb<sup>2+</sup> ions by Mn<sup>2+</sup> ions in a perfect crystal structure.

|         | V <sub>Cl</sub> | V <sub>Pb</sub> | V <sub>Pb-Cl-1</sub> | V <sub>Pb-Cl-2</sub> | V <sub>Pb-Cl-3</sub> | D <sub>Mn-Cl</sub> | D <sub>Mn</sub> | Sub <sub>Mn</sub> |
|---------|-----------------|-----------------|----------------------|----------------------|----------------------|--------------------|-----------------|-------------------|
| Cl-rich | 3.618           | 1.451           | 1.364                | 2.130                | 2.254                | -1.151             | 2.334eV         | 0.213             |
| Cl-poor | 0.918           | 5.913           | 3.126                | 3.892                | 4.016                | 1.549              |                 | 4.675             |

**Table S2.** Mn<sup>2+</sup> doping contents determined from inductively coupled plasma atomic emission spectroscopy (ICP-AES).

| Cs: Pb: Cl: Mn<br>precursors ratio | Mn <sup>2+</sup> doping content<br>from ICP-AES (mol%) |
|------------------------------------|--------------------------------------------------------|
| 1:1:3-1                            | 2.51                                                   |
| 1:1:4.5-1                          | 5.65                                                   |
| 1:1:6-1                            | 8.12                                                   |

**Figure S1-S9**

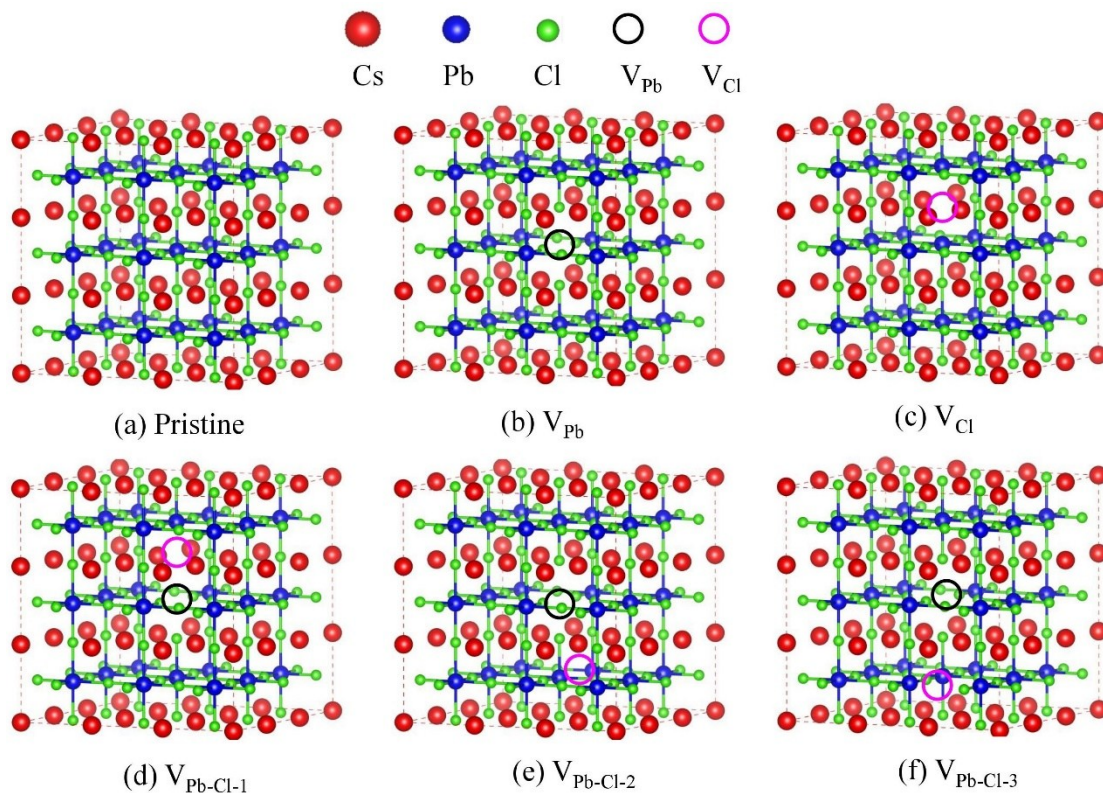

**Figure S1.** Crystal structure of (a) pristine, (b)  $Pb^{2+}$  vacancy  $V_{Pb}$ , (c)  $Cl^-$  vacancy  $V_{Cl}$ , (d)  $Pb^{2+}$  vacancy bond with  $Cl^-$  vacancy  $V_{Pb-Cl-1}$ , (e)  $Pb^{2+}$  vacancy together with non-connective but closer  $Cl^-$  vacancy  $V_{Pb-Cl-2}$ , (f)  $Pb^{2+}$  vacancy together with non-connective but farther  $Cl^-$  vacancy  $V_{Pb-Cl-3}$ .

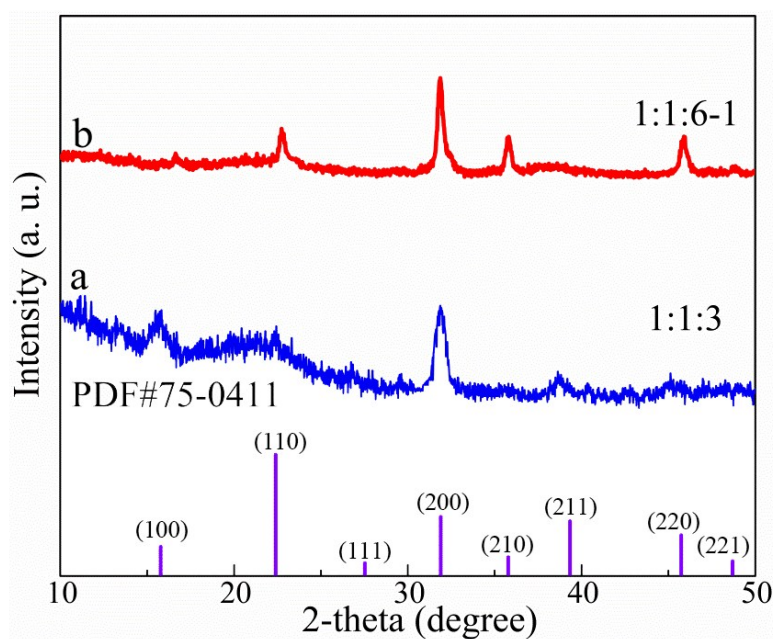

**Figure S2.** XRD patterns of the as-prepared  $CsPbCl_3$  nanocrystals at a stoichiometry precursors content and  $Mn^{2+}$  doped  $CsPbCl_3$  QDs at excessive  $Cl^-$  content.

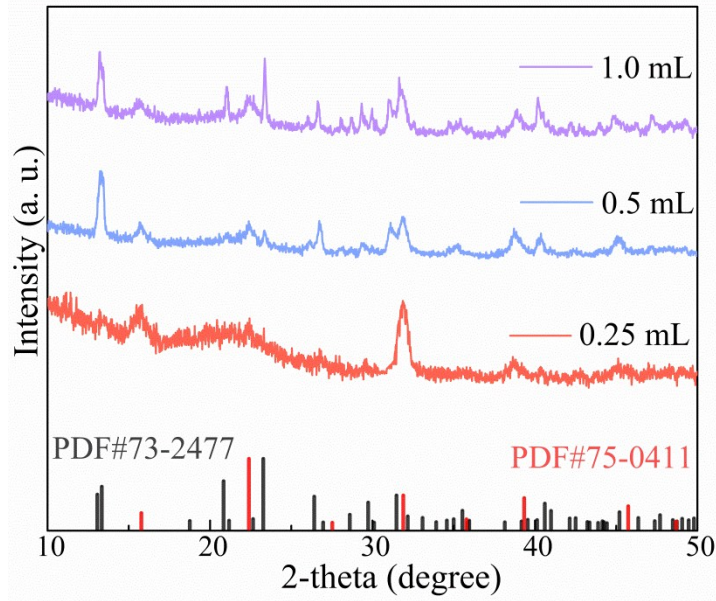

**Figure S3.** XRD patterns of the CsPbCl<sub>3</sub> nanocrystals prepared with different acetone content.

Acetone could promote the ionization of the precursors including CsOOR (cerium oleate complex) and Pb(OOR)<sub>2</sub> (lead oleate complex), and then nucleation of CsPbCl<sub>3</sub>. Equations of the ionization equilibrium of the precursors and the subsequent nucleation processes were given as below:

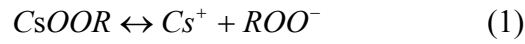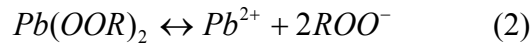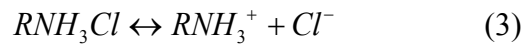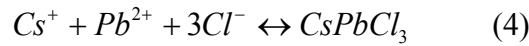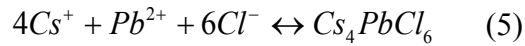

As a result, only CsPbCl<sub>3</sub> phase was formed below a critical Cs<sup>+</sup>, Pb<sup>2+</sup> and Cl<sup>-</sup> concentration. With the increase of acetone, the greatly enhanced ionization rate resulted a high concentration of Cs<sup>+</sup>, Pb<sup>2+</sup> and Cl<sup>-</sup> ions in the reaction solution, which then led to the formation of Cs<sub>4</sub>PbCl<sub>6</sub> phase accompany with CsPbCl<sub>3</sub> phase.

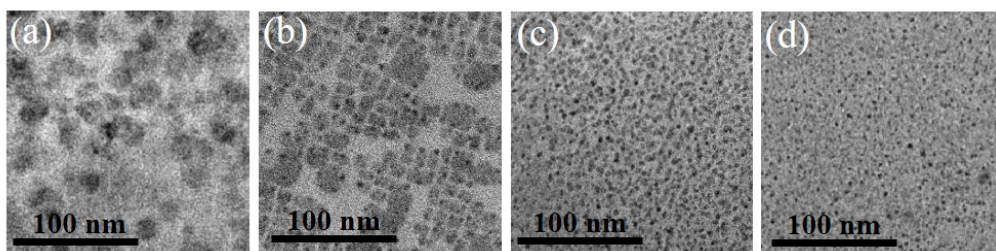

**Figure S4.** TEM images of the CsPbCl<sub>3</sub>: Mn nanocrystals under the condition of different Cl<sup>-</sup> contents: (a) 1.5 mM, (b) 3 mM, (c) 4.5 mM and (d) 6 mM.

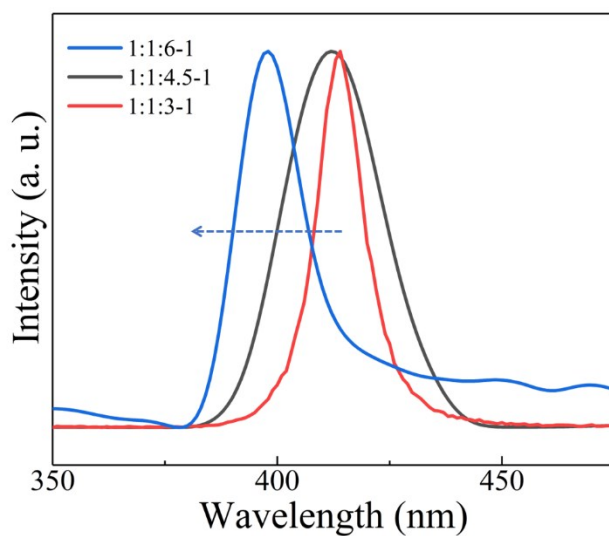

**Figure S5.** PL spectra of the Mn<sup>2+</sup> doped CsPbCl<sub>3</sub> perovskites under the condition of different Cl<sup>-</sup> content.

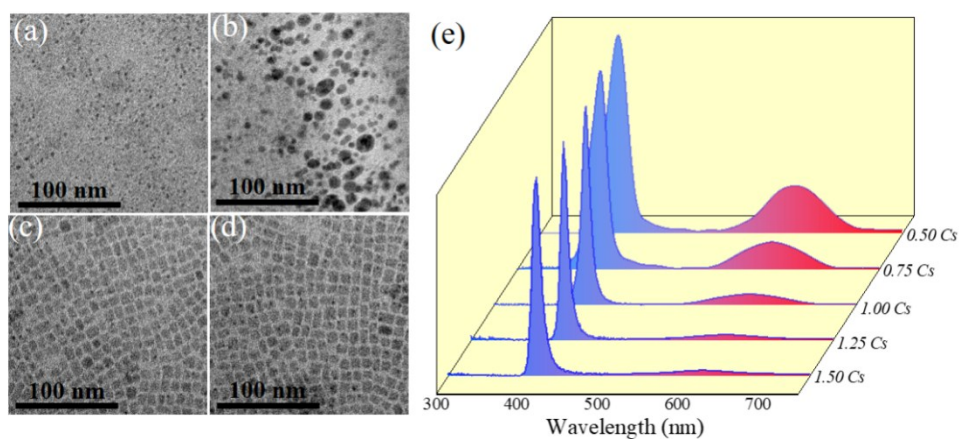

**Figure S6.** TEM images of the CsPbCl<sub>3</sub>: Mn nanocrystals under the condition of different Cs<sup>+</sup> contents: (a) 0.50 mM, (b) 0.75 mM, (c) 1.25 mM and (d) 1.5 mM. (e) PL spectra at different Cs<sup>+</sup> contents.



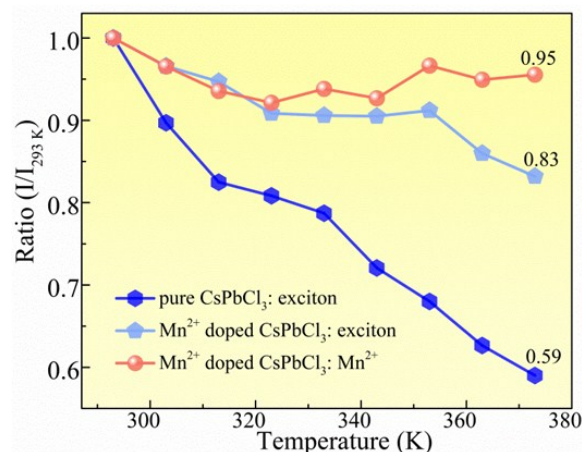

**Figure S7.** Temperature dependent integral emission intensities of pure CsPbCl<sub>3</sub>, Mn<sup>2+</sup> and exciton in the Mn<sup>2+</sup> doped CsPbCl<sub>3</sub> QDs.

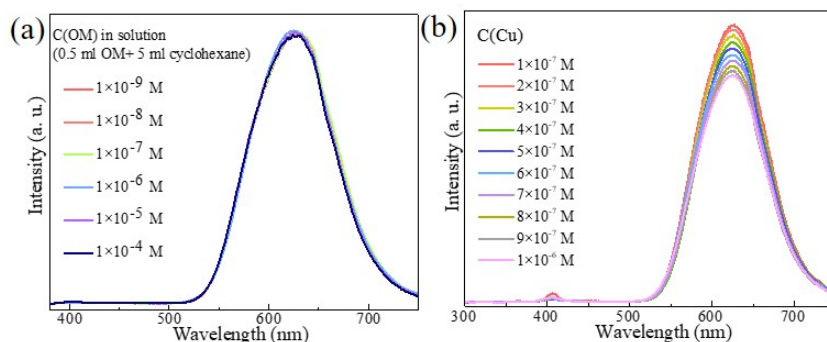

**Figure S8.** (a) PL spectra of the CsPbCl<sub>3</sub>: Mn suspensions at different OM concentration. (b) PL spectra of the CsPbCl<sub>3</sub> suspensions versus Cu<sup>2+</sup> concentration ranging from 1×10<sup>-7</sup> M to 1×10<sup>-6</sup> M.

The relationship between  $I/I_0$  and concentration of Cu<sup>2+</sup> ion could be fitted well by the following equation:

$$I/I_0 = A + K[C] \quad (1)$$

Where  $I$  and  $I_0$  were the PL intensities with and without Cu<sup>2+</sup> ions, respectively.  $A$  was the fitted intercept,  $K$  was the slope (sensitivity), and  $[C]$  represented the concentration of Cu<sup>2+</sup> ions. As shown in Figure 5d, the relationship was linearly fitted well with  $R^2=0.999$ . Thus, the limit of detection (LOD) was calculated, basing on the equation of

$$\text{LOD} = 3\sigma/K \quad (2)$$

Where  $\sigma$  was the standard deviation of the blank.

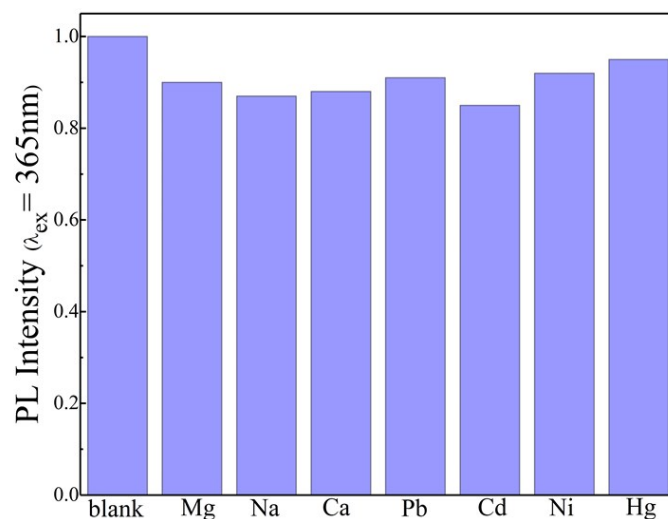

**Figure S9.**  $\text{Mn}^{2+}$  PL intensity (I) under different metal ions. The metal ions concentration was  $1.0 \times 10^{-3}$  M.

## References

- [1] J. Kang and L. Wang, *J. Phys. Chem. Lett.*, **2017**, 8, 489–493.
- [2] Z. Yong, S. Guo, J. Ma, J. Zhang, Z. Li, Y. Chen, B. Zhang, Y. Zhou, J. Shu, J. Gu, L. Zheng, O. M. Bakr and H. T. Sun, *J. Am. Chem. Soc.*, **2018**, 140, 9942-9951.
